# Supplementary material
Source: publisher figshare collection journal article supplement (https://acs.figshare.com/ndownloader/files/3719119)
Supplement: Supplementary file 1 [file 3719119]

  
data_ic16812 
  
_audit_creation_method            SHELXL-97 
_chemical_name_systematic 
; 
 ? 
; 
_chemical_name_common             ? 
_chemical_melting_point           ? 
_chemical_formula_moiety          ? 
_chemical_formula_sum 
 'C54 H40 N4' 
_chemical_formula_weight          744.90 
  
loop_ 
 _atom_type_symbol 
 _atom_type_description 
 _atom_type_scat_dispersion_real 
 _atom_type_scat_dispersion_imag 
 _atom_type_scat_source 
 'C'  'C'   0.0181   0.0091 
 'International Tables Vol C Tables 4.2.6.8 and 6.1.1.4' 
 'H'  'H'   0.0000   0.0000 
 'International Tables Vol C Tables 4.2.6.8 and 6.1.1.4' 
 'N'  'N'   0.0311   0.0180 
 'International Tables Vol C Tables 4.2.6.8 and 6.1.1.4' 
  
_symmetry_cell_setting            Triclinic 
_symmetry_space_group_name_H-M    P-1 
  
loop_ 
 _symmetry_equiv_pos_as_xyz 
 'x, y, z' 
 '-x, -y, -z' 
  
_cell_length_a                    10.5757(18) 
_cell_length_b                    13.339(2) 
_cell_length_c                    15.978(3) 
_cell_angle_alpha                 97.350(14) 
_cell_angle_beta                  106.509(15) 
_cell_angle_gamma                 107.809(16) 
_cell_volume                      1999.8(6) 
_cell_formula_units_Z             2 
_cell_measurement_temperature     200(2) 
_cell_measurement_reflns_used     860 
_cell_measurement_theta_min       4.0190 
_cell_measurement_theta_max       64.0360 
  
_exptl_crystal_description        ? 
_exptl_crystal_colour             ? 
_exptl_crystal_size_max           0.20 
_exptl_crystal_size_mid           0.15 
_exptl_crystal_size_min           0.10 
_exptl_crystal_density_meas       ? 
_exptl_crystal_density_diffrn     1.237 
_exptl_crystal_density_method     'not measured' 
_exptl_crystal_F_000              784 
_exptl_absorpt_coefficient_mu     0.557 
_exptl_absorpt_correction_type    multi-scan 
_exptl_absorpt_correction_T_min   0.91056 
_exptl_absorpt_correction_T_max   1.00000 
_exptl_absorpt_process_details     
; 
CrysAlisPro, Agilent Technologies, 
Version 1.171.37.31 (release 14-01-2014 CrysAlis171 .NET) 
(compiled Jan 14 2014,18:38:05) 
Empirical absorption correction using spherical harmonics, 
 implemented in SCALE3 ABSPACK scaling algorithm. 
; 
  
_exptl_special_details 
; 
 ? 
; 
  
_diffrn_ambient_temperature       200(2) 
_diffrn_radiation_wavelength      1.54178 
_diffrn_radiation_type            CuK\a 
_diffrn_radiation_source          'fine-focus sealed tube' 
_diffrn_radiation_monochromator   graphite 
_diffrn_measurement_device_type   'Oxford Diffraction Gemini A' 
_diffrn_measurement_method        CCD 
_diffrn_detector_area_resol_mean  ? 
_diffrn_standards_number          ? 
_diffrn_standards_interval_count  ? 
_diffrn_standards_interval_time   ? 
_diffrn_standards_decay_%         ? 
_diffrn_reflns_number             10987 
_diffrn_reflns_av_R_equivalents   0.1355 
_diffrn_reflns_av_sigmaI/netI     0.2346 
_diffrn_reflns_limit_h_min        -12 
_diffrn_reflns_limit_h_max        12 
_diffrn_reflns_limit_k_min        -14 
_diffrn_reflns_limit_k_max        16 
_diffrn_reflns_limit_l_min        -19 
_diffrn_reflns_limit_l_max        14 
_diffrn_reflns_theta_min          3.58 
_diffrn_reflns_theta_max          67.99 
_reflns_number_total              7173 
_reflns_number_gt                 2311 
_reflns_threshold_expression      >2sigma(I) 
  
_computing_data_collection         
; 
CrysAlisPro, Agilent Technologies, 
Version 1.171.37.31 (release 14-01-2014 CrysAlis171 .NET) 
(compiled Jan 14 2014,18:38:05) 
Empirical absorption correction using spherical harmonics, 
 implemented in SCALE3 ABSPACK scaling algorithm. 
; 
_computing_cell_refinement         
; 
CrysAlisPro, Agilent Technologies, 
Version 1.171.37.31 (release 14-01-2014 CrysAlis171 .NET) 
(compiled Jan 14 2014,18:38:05) 
Empirical absorption correction using spherical harmonics, 
 implemented in SCALE3 ABSPACK scaling algorithm. 
; 
_computing_data_reduction          
; 
CrysAlisPro, Agilent Technologies, 
Version 1.171.37.31 (release 14-01-2014 CrysAlis171 .NET) 
(compiled Jan 14 2014,18:38:05) 
Empirical absorption correction using spherical harmonics, 
 implemented in SCALE3 ABSPACK scaling algorithm. 
; 
_computing_structure_solution     'SHELXS-97 (Sheldrick, 1990)' 
_computing_structure_refinement   'SHELXL-97 (Sheldrick, 1997)' 
_computing_molecular_graphics     SHELXTL 
_computing_publication_material   SHELXTL 
  
_refine_special_details 
; 
 Refinement of F^2^ against ALL reflections.  The weighted R-factor wR and 
 goodness of fit S are based on F^2^, conventional R-factors R are based 
 on F, with F set to zero for negative F^2^. The threshold expression of 
 F^2^ > 2sigma(F^2^) is used only for calculating R-factors(gt) etc. and is 
 not relevant to the choice of reflections for refinement.  R-factors based 
 on F^2^ are statistically about twice as large as those based on F, and R- 
 factors based on ALL data will be even larger. 
; 
  
_refine_ls_structure_factor_coef  Fsqd 
_refine_ls_matrix_type            full 
_refine_ls_weighting_scheme       calc 
_refine_ls_weighting_details 
 'calc w=1/[\s^2^(Fo^2^)+(0.1000P)^2^+0.0000P] where P=(Fo^2^+2Fc^2^)/3' 
_atom_sites_solution_primary      direct 
_atom_sites_solution_secondary    difmap 
_atom_sites_solution_hydrogens    geom 
_refine_ls_hydrogen_treatment     mixed 
_refine_ls_extinction_method      SHELXL 
_refine_ls_extinction_coef        0.0005(2) 
_refine_ls_extinction_expression 
 'Fc^*^=kFc[1+0.001xFc^2^\l^3^/sin(2\q)]^-1/4^' 
_refine_ls_number_reflns          7173 
_refine_ls_number_parameters      524 
_refine_ls_number_restraints      0 
_refine_ls_R_factor_all           0.2052 
_refine_ls_R_factor_gt            0.0844 
_refine_ls_wR_factor_ref          0.3529 
_refine_ls_wR_factor_gt           0.2282 
_refine_ls_goodness_of_fit_ref    0.908 
_refine_ls_restrained_S_all       0.908 
_refine_ls_shift/su_max           0.009 
_refine_ls_shift/su_mean          0.002 
  
loop_ 
 _atom_site_label 
 _atom_site_type_symbol 
 _atom_site_fract_x 
 _atom_site_fract_y 
 _atom_site_fract_z 
 _atom_site_U_iso_or_equiv 
 _atom_site_adp_type 
 _atom_site_occupancy 
 _atom_site_symmetry_multiplicity 
 _atom_site_calc_flag 
 _atom_site_refinement_flags 
 _atom_site_disorder_assembly 
 _atom_site_disorder_group 
N1 N 0.4751(6) 0.5402(5) 0.7734(4) 0.0514(14) Uani 1 1 d . . . 
N2 N 0.5990(6) 0.7576(5) 0.5104(4) 0.0474(13) Uani 1 1 d . . . 
N3 N 0.4993(6) 0.8988(5) 0.3538(4) 0.0470(13) Uani 1 1 d . . . 
N4 N 0.6154(6) 1.1536(5) 0.1120(4) 0.0555(16) Uani 1 1 d . . . 
C1 C 0.3335(7) 0.4837(5) 0.7669(5) 0.0487(16) Uani 1 1 d . . . 
C2 C 0.2479(8) 0.5404(6) 0.7759(5) 0.0558(17) Uani 1 1 d . . . 
H2A H 0.2835 0.6172 0.7863 0.067 Uiso 1 1 calc R . . 
C3 C 0.1096(9) 0.4864(7) 0.7699(6) 0.071(2) Uani 1 1 d . . . 
H3A H 0.0498 0.5258 0.7748 0.085 Uiso 1 1 calc R . . 
C4 C 0.0593(9) 0.3746(8) 0.7568(7) 0.084(3) Uani 1 1 d . . . 
H4A H -0.0340 0.3372 0.7550 0.101 Uiso 1 1 calc R . . 
C5 C 0.1453(9) 0.3177(7) 0.7464(6) 0.073(2) Uani 1 1 d . . . 
H5A H 0.1094 0.2409 0.7348 0.088 Uiso 1 1 calc R . . 
C6 C 0.2826(9) 0.3714(6) 0.7527(6) 0.066(2) Uani 1 1 d . . . 
H6A H 0.3423 0.3321 0.7475 0.079 Uiso 1 1 calc R . . 
C7 C 0.5813(8) 0.4988(7) 0.8145(6) 0.066(2) Uani 1 1 d . . . 
C8 C 0.6237(10) 0.5107(8) 0.9048(7) 0.087(3) Uani 1 1 d . . . 
H8A H 0.5846 0.5458 0.9407 0.104 Uiso 1 1 calc R . . 
C9 C 0.7281(13) 0.4688(13) 0.9436(13) 0.173(10) Uani 1 1 d . . . 
H9A H 0.7574 0.4747 1.0065 0.208 Uiso 1 1 calc R . . 
C10 C 0.7864(14) 0.4220(18) 0.8959(19) 0.232(16) Uani 1 1 d . . . 
H10A H 0.8595 0.3978 0.9246 0.278 Uiso 1 1 calc R . . 
C11 C 0.7386(19) 0.4081(16) 0.8003(18) 0.217(13) Uani 1 1 d . . . 
H11A H 0.7766 0.3721 0.7642 0.261 Uiso 1 1 calc R . . 
C12 C 0.6367(16) 0.4479(11) 0.7624(11) 0.137(6) Uani 1 1 d . . . 
H12A H 0.6040 0.4401 0.6993 0.165 Uiso 1 1 calc R . . 
C13 C 0.5011(7) 0.6006(5) 0.7097(5) 0.0458(15) Uani 1 1 d . . . 
C14 C 0.6262(7) 0.6855(6) 0.7305(5) 0.0481(15) Uani 1 1 d . . . 
H14A H 0.6914 0.7078 0.7902 0.058 Uiso 1 1 calc R . . 
C15 C 0.6604(7) 0.7402(5) 0.6663(5) 0.0469(15) Uani 1 1 d . . . 
H15A H 0.7479 0.7987 0.6822 0.056 Uiso 1 1 calc R . . 
C16 C 0.5659(7) 0.7084(5) 0.5799(5) 0.0475(15) Uani 1 1 d . . . 
C17 C 0.4359(7) 0.6284(6) 0.5585(5) 0.0555(17) Uani 1 1 d . . . 
H17A H 0.3692 0.6095 0.4994 0.067 Uiso 1 1 calc R . . 
C18 C 0.4010(7) 0.5747(6) 0.6227(5) 0.0527(17) Uani 1 1 d . . . 
H18A H 0.3100 0.5209 0.6079 0.063 Uiso 1 1 calc R . . 
C19 C 0.8336(7) 0.7354(6) 0.5232(5) 0.0513(16) Uani 1 1 d . . . 
C20 C 0.8112(8) 0.6390(6) 0.5523(5) 0.0584(18) Uani 1 1 d . . . 
H20A H 0.7198 0.5989 0.5522 0.070 Uiso 1 1 calc R . . 
C21 C 0.9204(10) 0.6017(8) 0.5812(5) 0.073(2) Uani 1 1 d . . . 
H21A H 0.9031 0.5363 0.6011 0.088 Uiso 1 1 calc R . . 
C22 C 1.0512(9) 0.6562(8) 0.5816(6) 0.076(2) Uani 1 1 d . . . 
H22A H 1.1238 0.6274 0.5993 0.091 Uiso 1 1 calc R . . 
C23 C 1.0800(9) 0.7542(9) 0.5563(6) 0.077(3) Uani 1 1 d . . . 
H23A H 1.1732 0.7950 0.5598 0.092 Uiso 1 1 calc R . . 
C24 C 0.9717(8) 0.7909(7) 0.5261(6) 0.064(2) Uani 1 1 d . . . 
H24A H 0.9907 0.8564 0.5064 0.077 Uiso 1 1 calc R . . 
C25 C 0.7216(8) 0.7771(6) 0.4878(5) 0.0532(16) Uani 1 1 d . . . 
C26 C 0.7133(7) 0.8352(5) 0.4216(5) 0.0504(16) Uani 1 1 d . . . 
H26A H 0.7816 0.8597 0.3938 0.060 Uiso 1 1 calc R . . 
C27 C 0.5847(7) 0.8504(5) 0.4043(4) 0.0459(14) Uani 1 1 d . . . 
C28 C 0.5120(7) 0.8006(6) 0.4574(4) 0.0499(16) Uani 1 1 d . . . 
C29 C 0.3853(7) 0.8204(6) 0.4421(5) 0.0527(17) Uani 1 1 d . . . 
H29A H 0.3169 0.7967 0.4701 0.063 Uiso 1 1 calc R . . 
C30 C 0.3799(7) 0.8814(6) 0.3782(5) 0.0496(16) Uani 1 1 d . . . 
C31 C 0.2622(6) 0.9155(5) 0.3346(4) 0.0459(14) Uani 1 1 d . . . 
C32 C 0.1918(8) 0.9523(6) 0.3854(5) 0.0584(17) Uani 1 1 d . . . 
H32A H 0.2203 0.9564 0.4481 0.070 Uiso 1 1 calc R . . 
C33 C 0.0807(8) 0.9830(6) 0.3452(6) 0.0617(19) Uani 1 1 d . . . 
H33A H 0.0316 1.0052 0.3809 0.074 Uiso 1 1 calc R . . 
C34 C 0.0380(8) 0.9829(6) 0.2557(6) 0.067(2) Uani 1 1 d . . . 
H34A H -0.0370 1.0068 0.2300 0.080 Uiso 1 1 calc R . . 
C35 C 0.1094(8) 0.9459(7) 0.2028(6) 0.066(2) Uani 1 1 d . . . 
H35A H 0.0829 0.9451 0.1406 0.079 Uiso 1 1 calc R . . 
C36 C 0.2192(7) 0.9107(6) 0.2425(5) 0.0559(18) Uani 1 1 d . . . 
H36A H 0.2646 0.8834 0.2067 0.067 Uiso 1 1 calc R . . 
C37 C 0.5429(7) 0.9693(5) 0.2982(4) 0.0475(15) Uani 1 1 d . . . 
C38 C 0.5303(7) 1.0694(5) 0.3083(5) 0.0484(15) Uani 1 1 d . . . 
H38A H 0.5014 1.0946 0.3555 0.058 Uiso 1 1 calc R . . 
C39 C 0.5598(7) 1.1333(5) 0.2492(5) 0.0489(15) Uani 1 1 d . . . 
H39A H 0.5532 1.2031 0.2560 0.059 Uiso 1 1 calc R . . 
C40 C 0.5997(7) 1.0928(6) 0.1791(5) 0.0511(17) Uani 1 1 d . . . 
C41 C 0.6209(8) 0.9974(6) 0.1731(5) 0.0553(18) Uani 1 1 d . . . 
H41A H 0.6566 0.9746 0.1288 0.066 Uiso 1 1 calc R . . 
C42 C 0.5896(7) 0.9316(5) 0.2330(5) 0.0497(16) Uani 1 1 d . . . 
H42A H 0.6006 0.8633 0.2282 0.060 Uiso 1 1 calc R . . 
C43 C 0.4972(7) 1.1712(6) 0.0584(5) 0.0488(15) Uani 1 1 d . . . 
C44 C 0.3610(7) 1.1066(6) 0.0514(5) 0.0510(16) Uani 1 1 d . . . 
H44A H 0.3488 1.0514 0.0838 0.061 Uiso 1 1 calc R . . 
C45 C 0.2439(8) 1.1223(6) -0.0022(5) 0.0598(18) Uani 1 1 d . . . 
H45A H 0.1523 1.0780 -0.0055 0.072 Uiso 1 1 calc R . . 
C46 C 0.2571(8) 1.2012(7) -0.0512(6) 0.066(2) Uani 1 1 d . . . 
H46A H 0.1766 1.2103 -0.0896 0.079 Uiso 1 1 calc R . . 
C47 C 0.3915(8) 1.2654(6) -0.0417(5) 0.0601(19) Uani 1 1 d . . . 
H47A H 0.4033 1.3216 -0.0731 0.072 Uiso 1 1 calc R . . 
C48 C 0.5101(7) 1.2521(6) 0.0110(5) 0.0539(17) Uani 1 1 d . . . 
H48A H 0.6012 1.2983 0.0151 0.065 Uiso 1 1 calc R . . 
C49 C 0.7508(7) 1.1893(5) 0.1019(5) 0.0501(17) Uani 1 1 d . . . 
C50 C 0.8728(7) 1.2275(7) 0.1781(5) 0.0557(17) Uani 1 1 d . . . 
H50A H 0.8645 1.2290 0.2358 0.067 Uiso 1 1 calc R . . 
C51 C 1.0040(9) 1.2628(8) 0.1707(6) 0.075(3) Uani 1 1 d . . . 
H51A H 1.0859 1.2875 0.2231 0.090 Uiso 1 1 calc R . . 
C52 C 1.0179(8) 1.2627(8) 0.0872(6) 0.068(2) Uani 1 1 d . . . 
H52A H 1.1090 1.2896 0.0822 0.082 Uiso 1 1 calc R . . 
C53 C 0.8977(8) 1.2231(6) 0.0106(5) 0.0591(18) Uani 1 1 d . . . 
H53A H 0.9071 1.2211 -0.0470 0.071 Uiso 1 1 calc R . . 
C54 C 0.7640(8) 1.1865(6) 0.0174(5) 0.0536(17) Uani 1 1 d . . . 
H54A H 0.6822 1.1597 -0.0351 0.064 Uiso 1 1 calc R . . 
  
loop_ 
 _atom_site_aniso_label 
 _atom_site_aniso_U_11 
 _atom_site_aniso_U_22 
 _atom_site_aniso_U_33 
 _atom_site_aniso_U_23 
 _atom_site_aniso_U_13 
 _atom_site_aniso_U_12 
N1 0.053(3) 0.069(4) 0.049(3) 0.034(3) 0.025(3) 0.030(3) 
N2 0.042(3) 0.063(3) 0.044(3) 0.031(3) 0.017(2) 0.017(3) 
N3 0.050(3) 0.060(3) 0.043(3) 0.029(3) 0.023(3) 0.022(3) 
N4 0.046(3) 0.071(4) 0.063(4) 0.043(3) 0.026(3) 0.022(3) 
C1 0.048(4) 0.049(4) 0.054(4) 0.029(3) 0.022(3) 0.012(3) 
C2 0.055(4) 0.057(4) 0.060(4) 0.021(3) 0.026(4) 0.017(3) 
C3 0.059(5) 0.080(5) 0.095(7) 0.039(5) 0.041(5) 0.033(4) 
C4 0.052(5) 0.082(6) 0.116(8) 0.046(6) 0.036(5) 0.005(4) 
C5 0.060(5) 0.068(5) 0.086(6) 0.025(4) 0.030(5) 0.007(4) 
C6 0.074(5) 0.061(4) 0.076(6) 0.027(4) 0.032(5) 0.030(4) 
C7 0.058(4) 0.068(5) 0.096(6) 0.056(5) 0.037(5) 0.031(4) 
C8 0.063(5) 0.091(7) 0.081(6) 0.045(5) -0.005(5) 0.010(5) 
C9 0.075(8) 0.154(13) 0.25(2) 0.171(15) -0.012(10) 0.005(8) 
C10 0.066(8) 0.25(2) 0.45(4) 0.28(3) 0.068(14) 0.079(11) 
C11 0.173(16) 0.23(2) 0.45(4) 0.26(3) 0.22(2) 0.168(17) 
C12 0.170(14) 0.128(11) 0.227(17) 0.110(12) 0.139(13) 0.115(11) 
C13 0.040(3) 0.051(3) 0.052(4) 0.026(3) 0.020(3) 0.015(3) 
C14 0.044(3) 0.062(4) 0.045(4) 0.026(3) 0.016(3) 0.022(3) 
C15 0.045(3) 0.053(4) 0.053(4) 0.031(3) 0.022(3) 0.019(3) 
C16 0.050(4) 0.052(4) 0.053(4) 0.030(3) 0.023(3) 0.023(3) 
C17 0.047(4) 0.067(4) 0.056(4) 0.032(4) 0.020(3) 0.016(3) 
C18 0.043(3) 0.056(4) 0.052(4) 0.024(3) 0.015(3) 0.004(3) 
C19 0.048(4) 0.062(4) 0.047(4) 0.017(3) 0.017(3) 0.021(3) 
C20 0.062(4) 0.056(4) 0.058(4) 0.021(3) 0.014(4) 0.026(4) 
C21 0.097(7) 0.085(6) 0.051(5) 0.023(4) 0.019(5) 0.055(5) 
C22 0.061(5) 0.104(7) 0.080(6) 0.037(5) 0.019(5) 0.052(5) 
C23 0.059(5) 0.116(8) 0.075(6) 0.033(5) 0.036(5) 0.041(5) 
C24 0.053(4) 0.082(5) 0.074(5) 0.038(4) 0.031(4) 0.030(4) 
C25 0.060(4) 0.060(4) 0.046(4) 0.020(3) 0.026(3) 0.021(3) 
C26 0.058(4) 0.056(4) 0.050(4) 0.022(3) 0.031(3) 0.022(3) 
C27 0.047(4) 0.056(4) 0.047(4) 0.021(3) 0.024(3) 0.024(3) 
C28 0.041(3) 0.065(4) 0.041(4) 0.023(3) 0.010(3) 0.015(3) 
C29 0.049(4) 0.072(4) 0.052(4) 0.034(4) 0.024(3) 0.028(3) 
C30 0.043(4) 0.062(4) 0.052(4) 0.028(3) 0.019(3) 0.022(3) 
C31 0.037(3) 0.050(3) 0.049(4) 0.019(3) 0.010(3) 0.014(3) 
C32 0.048(4) 0.065(4) 0.065(5) 0.018(4) 0.023(4) 0.021(3) 
C33 0.047(4) 0.052(4) 0.084(6) 0.010(4) 0.018(4) 0.021(3) 
C34 0.048(4) 0.055(4) 0.095(6) 0.027(4) 0.019(4) 0.016(3) 
C35 0.051(4) 0.078(5) 0.063(5) 0.034(4) 0.008(4) 0.017(4) 
C36 0.044(4) 0.069(4) 0.046(4) 0.026(3) 0.009(3) 0.011(3) 
C37 0.048(4) 0.053(4) 0.045(4) 0.020(3) 0.019(3) 0.017(3) 
C38 0.052(4) 0.055(4) 0.046(4) 0.020(3) 0.024(3) 0.020(3) 
C39 0.046(4) 0.045(3) 0.060(4) 0.021(3) 0.020(3) 0.018(3) 
C40 0.036(3) 0.066(4) 0.057(4) 0.037(4) 0.015(3) 0.019(3) 
C41 0.059(4) 0.079(5) 0.047(4) 0.033(4) 0.030(4) 0.033(4) 
C42 0.055(4) 0.049(3) 0.055(4) 0.027(3) 0.026(3) 0.020(3) 
C43 0.039(3) 0.055(4) 0.053(4) 0.024(3) 0.016(3) 0.012(3) 
C44 0.040(3) 0.063(4) 0.054(4) 0.027(3) 0.017(3) 0.017(3) 
C45 0.046(4) 0.072(5) 0.062(5) 0.024(4) 0.024(4) 0.014(3) 
C46 0.055(4) 0.075(5) 0.065(5) 0.020(4) 0.010(4) 0.029(4) 
C47 0.052(4) 0.060(4) 0.066(5) 0.031(4) 0.009(4) 0.022(3) 
C48 0.039(3) 0.063(4) 0.061(4) 0.033(4) 0.013(3) 0.017(3) 
C49 0.047(4) 0.055(4) 0.059(4) 0.037(3) 0.024(3) 0.018(3) 
C50 0.043(4) 0.085(5) 0.043(4) 0.025(3) 0.011(3) 0.027(4) 
C51 0.050(4) 0.114(7) 0.069(6) 0.047(5) 0.022(4) 0.030(5) 
C52 0.038(4) 0.099(6) 0.072(5) 0.039(5) 0.021(4) 0.020(4) 
C53 0.062(5) 0.072(5) 0.056(4) 0.026(4) 0.032(4) 0.026(4) 
C54 0.049(4) 0.069(4) 0.050(4) 0.029(3) 0.020(3) 0.023(3) 
  
_geom_special_details 
; 
 All esds (except the esd in the dihedral angle between two l.s. planes) 
 are estimated using the full covariance matrix.  The cell esds are taken 
 into account individually in the estimation of esds in distances, angles 
 and torsion angles; correlations between esds in cell parameters are only 
 used when they are defined by crystal symmetry.  An approximate (isotropic) 
 treatment of cell esds is used for estimating esds involving l.s. planes. 
; 
  
loop_ 
 _geom_bond_atom_site_label_1 
 _geom_bond_atom_site_label_2 
 _geom_bond_distance 
 _geom_bond_site_symmetry_2 
 _geom_bond_publ_flag 
N1 C13 1.414(7) . ? 
N1 C1 1.421(8) . ? 
N1 C7 1.431(9) . ? 
N2 C28 1.377(8) . ? 
N2 C25 1.401(9) . ? 
N2 C16 1.433(7) . ? 
N3 C30 1.386(8) . ? 
N3 C27 1.400(8) . ? 
N3 C37 1.438(7) . ? 
N4 C43 1.405(8) . ? 
N4 C49 1.427(8) . ? 
N4 C40 1.441(7) . ? 
C1 C2 1.371(10) . ? 
C1 C6 1.391(10) . ? 
C2 C3 1.388(10) . ? 
C3 C4 1.387(13) . ? 
C4 C5 1.381(13) . ? 
C5 C6 1.376(11) . ? 
C7 C8 1.357(13) . ? 
C7 C12 1.367(15) . ? 
C8 C9 1.410(15) . ? 
C9 C10 1.32(3) . ? 
C10 C11 1.43(3) . ? 
C11 C12 1.368(17) . ? 
C13 C14 1.371(9) . ? 
C13 C18 1.411(9) . ? 
C14 C15 1.400(8) . ? 
C15 C16 1.375(10) . ? 
C16 C17 1.374(10) . ? 
C17 C18 1.394(8) . ? 
C19 C20 1.398(10) . ? 
C19 C24 1.405(10) . ? 
C19 C25 1.462(10) . ? 
C20 C21 1.379(11) . ? 
C21 C22 1.349(13) . ? 
C22 C23 1.388(13) . ? 
C23 C24 1.368(11) . ? 
C25 C26 1.387(9) . ? 
C26 C27 1.391(9) . ? 
C27 C28 1.398(8) . ? 
C28 C29 1.404(9) . ? 
C29 C30 1.385(9) . ? 
C30 C31 1.475(8) . ? 
C31 C32 1.385(10) . ? 
C31 C36 1.397(9) . ? 
C32 C33 1.376(10) . ? 
C33 C34 1.371(11) . ? 
C34 C35 1.419(12) . ? 
C35 C36 1.401(10) . ? 
C37 C42 1.376(10) . ? 
C37 C38 1.376(10) . ? 
C38 C39 1.389(9) . ? 
C39 C40 1.405(10) . ? 
C40 C41 1.355(10) . ? 
C41 C42 1.419(8) . ? 
C43 C48 1.391(9) . ? 
C43 C44 1.398(9) . ? 
C44 C45 1.383(10) . ? 
C45 C46 1.387(10) . ? 
C46 C47 1.370(11) . ? 
C47 C48 1.374(9) . ? 
C49 C54 1.393(9) . ? 
C49 C50 1.398(10) . ? 
C50 C51 1.367(10) . ? 
C51 C52 1.383(11) . ? 
C52 C53 1.390(11) . ? 
C53 C54 1.388(10) . ? 
  
loop_ 
 _geom_angle_atom_site_label_1 
 _geom_angle_atom_site_label_2 
 _geom_angle_atom_site_label_3 
 _geom_angle 
 _geom_angle_site_symmetry_1 
 _geom_angle_site_symmetry_3 
 _geom_angle_publ_flag 
C13 N1 C1 119.6(5) . . ? 
C13 N1 C7 116.4(5) . . ? 
C1 N1 C7 118.2(5) . . ? 
C28 N2 C25 108.8(5) . . ? 
C28 N2 C16 122.6(5) . . ? 
C25 N2 C16 128.5(5) . . ? 
C30 N3 C27 108.5(5) . . ? 
C30 N3 C37 126.8(5) . . ? 
C27 N3 C37 123.9(5) . . ? 
C43 N4 C49 123.7(5) . . ? 
C43 N4 C40 118.9(5) . . ? 
C49 N4 C40 117.4(5) . . ? 
C2 C1 C6 120.0(7) . . ? 
C2 C1 N1 119.8(6) . . ? 
C6 C1 N1 120.2(7) . . ? 
C1 C2 C3 120.4(7) . . ? 
C4 C3 C2 119.5(8) . . ? 
C5 C4 C3 119.8(7) . . ? 
C6 C5 C4 120.6(8) . . ? 
C5 C6 C1 119.6(8) . . ? 
C8 C7 C12 121.6(10) . . ? 
C8 C7 N1 118.5(8) . . ? 
C12 C7 N1 119.9(10) . . ? 
C7 C8 C9 117.5(14) . . ? 
C10 C9 C8 122.6(18) . . ? 
C9 C10 C11 119.4(12) . . ? 
C12 C11 C10 118.2(18) . . ? 
C7 C12 C11 120.8(17) . . ? 
C14 C13 C18 118.0(5) . . ? 
C14 C13 N1 120.6(6) . . ? 
C18 C13 N1 121.3(6) . . ? 
C13 C14 C15 121.9(6) . . ? 
C16 C15 C14 119.2(6) . . ? 
C17 C16 C15 120.2(6) . . ? 
C17 C16 N2 118.4(6) . . ? 
C15 C16 N2 121.4(6) . . ? 
C16 C17 C18 120.5(7) . . ? 
C17 C18 C13 119.8(6) . . ? 
C20 C19 C24 116.5(7) . . ? 
C20 C19 C25 123.6(7) . . ? 
C24 C19 C25 119.9(6) . . ? 
C21 C20 C19 120.6(8) . . ? 
C22 C21 C20 121.3(8) . . ? 
C21 C22 C23 120.3(7) . . ? 
C24 C23 C22 118.7(8) . . ? 
C23 C24 C19 122.5(7) . . ? 
C26 C25 N2 108.6(6) . . ? 
C26 C25 C19 126.0(6) . . ? 
N2 C25 C19 125.3(5) . . ? 
C25 C26 C27 106.1(6) . . ? 
C26 C27 C28 110.1(5) . . ? 
C26 C27 N3 143.6(6) . . ? 
C28 C27 N3 106.2(5) . . ? 
N2 C28 C27 106.3(6) . . ? 
N2 C28 C29 143.8(6) . . ? 
C27 C28 C29 109.6(5) . . ? 
C30 C29 C28 106.3(6) . . ? 
C29 C30 N3 109.4(6) . . ? 
C29 C30 C31 127.0(6) . . ? 
N3 C30 C31 123.4(5) . . ? 
C32 C31 C36 119.0(6) . . ? 
C32 C31 C30 119.7(6) . . ? 
C36 C31 C30 121.3(6) . . ? 
C33 C32 C31 120.2(7) . . ? 
C34 C33 C32 122.7(8) . . ? 
C33 C34 C35 117.9(7) . . ? 
C36 C35 C34 119.8(7) . . ? 
C31 C36 C35 120.4(8) . . ? 
C42 C37 C38 121.9(6) . . ? 
C42 C37 N3 118.4(6) . . ? 
C38 C37 N3 119.6(6) . . ? 
C37 C38 C39 119.7(6) . . ? 
C38 C39 C40 118.8(6) . . ? 
C41 C40 C39 121.2(6) . . ? 
C41 C40 N4 119.8(7) . . ? 
C39 C40 N4 119.0(6) . . ? 
C40 C41 C42 119.8(6) . . ? 
C37 C42 C41 118.3(6) . . ? 
C48 C43 C44 117.7(6) . . ? 
C48 C43 N4 122.1(6) . . ? 
C44 C43 N4 120.2(6) . . ? 
C45 C44 C43 120.6(6) . . ? 
C44 C45 C46 121.5(7) . . ? 
C47 C46 C45 117.0(7) . . ? 
C46 C47 C48 122.9(6) . . ? 
C47 C48 C43 120.2(6) . . ? 
C54 C49 C50 119.1(6) . . ? 
C54 C49 N4 121.3(7) . . ? 
C50 C49 N4 119.5(6) . . ? 
C51 C50 C49 121.0(7) . . ? 
C50 C51 C52 120.2(8) . . ? 
C51 C52 C53 119.6(7) . . ? 
C54 C53 C52 120.6(7) . . ? 
C53 C54 C49 119.5(7) . . ? 
  
_diffrn_measured_fraction_theta_max    0.984 
_diffrn_reflns_theta_full              67.99 
_diffrn_measured_fraction_theta_full   0.984 
_refine_diff_density_max    0.307 
_refine_diff_density_min   -0.219 
_refine_diff_density_rms    0.048 
